# Supplementary material
Source: PubMed Central journal article supplement (PMC11027673)
Supplement: 262_2020_2594_MOESM1_ESM.pdf [file 262_2020_2594_MOESM1_ESM.pdf]

### A RANK expression in GCTB

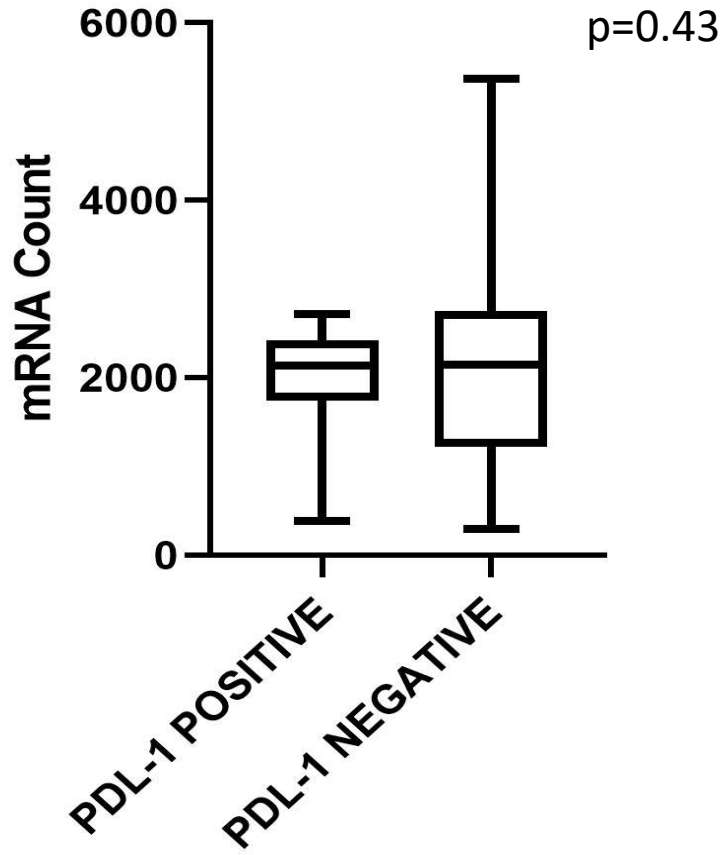

### B RANK-L expression in GCTB

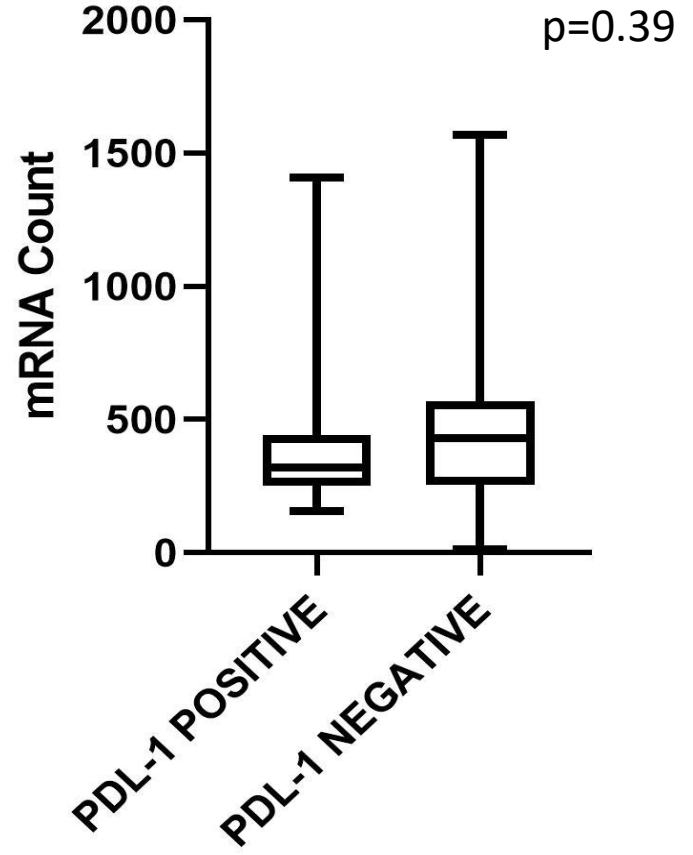

Supplementary Figure 1. RANK and RANK-L gene expression levels according to PD-L1 immunexpression in the group of GCTB.

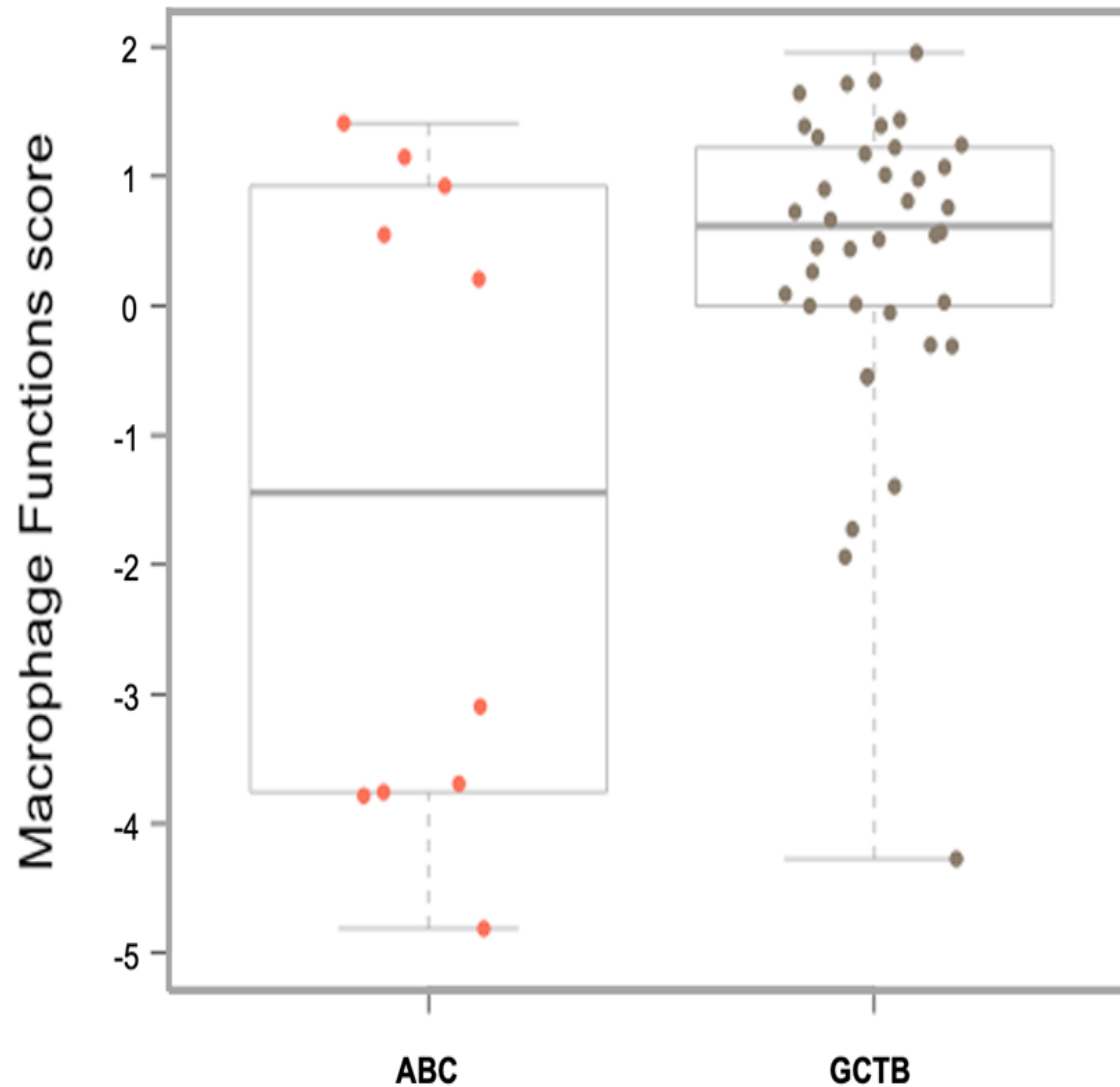

Supplementary Figure 2. Box Plot showing an expression score of genes related to macrophagic activity in giant cell tumors of bone and control cases of aneurysmal bone cysts.
